# Supplementary material for: Design of white-emitting optical temperature sensor based on energy transfer in a Bi3+, Eu3+ and Tb3+ doped YBO3 crystal
Source: Royal Society of Chemistry journal article supplement (doi:10.1039/d1tc01585k), 2021-01-01
Supplement: d1tc01585k1.pdf [file d1tc01585k1.pdf]

## Supporting Information

### **Design of white-emitting optical temperature sensor based on energy transfer in Bi<sup>3+</sup>, Eu<sup>3+</sup> and Tb<sup>3+</sup> doped YBO<sub>3</sub> crystal**

Haiyan Wu,<sup>a,b</sup> Huimin Li,<sup>a</sup> Lihong Jiang,<sup>a,\*</sup> Tao Tan,<sup>a,b</sup> Shangwei Wang,<sup>a</sup> Shengjian Jiao,<sup>a,b</sup> Weihong Yuan,<sup>a,b</sup> Jiangyue Su,<sup>a,b</sup> Chengyu Li<sup>a, b, c\*</sup> and Hongjie Zhang<sup>a, c</sup>

<sup>a</sup> State Key Laboratory of Rare Earth Resource Utilization Changchun Institute of Applied Chemistry Chinese Academy of Sciences Changchun 130022, P. R. China

<sup>b</sup> University of Science and Technology of China Hefei 230026, China

<sup>c</sup> Zhongke Rare Earth (Changchun) Co., Ltd Changchun 130000, China

**Table S1** Selected Y–O distance in  $\text{YBO}_3:\text{Bi}^{3+}$  and  $\text{YBO}_3:0.04\text{Bi}^{3+}, 0.003\text{Eu}^{3+}, 0.008\text{Tb}^{3+}$  sample.

| $\text{YBO}_3:\text{Bi}^{3+}$ |              | $\text{YBO}_3:0.04\text{Bi}^{3+}, 0.003\text{Eu}^{3+}, 0.008\text{Tb}^{3+}$ |              |
|-------------------------------|--------------|-----------------------------------------------------------------------------|--------------|
| Bonds                         | Distance (Å) | Bonds                                                                       | Distance (Å) |
| Y1-O1                         | 2.28473      | Y1-O1                                                                       | 2.30004      |
| Y1-O1                         | 2.28473      | Y1-O1                                                                       | 2.30004      |
| Y1-O2                         | 2.39051      | Y1-O2                                                                       | 2.40753      |
| Y1-O2                         | 2.39021      | Y1-O2                                                                       | 2.40723      |
| Y1-O2                         | 2.39051      | Y1-O2                                                                       | 2.40753      |
| Y1-O2                         | 2.39051      | Y1-O2                                                                       | 2.40753      |
| Y1-O2                         | 2.39021      | Y1-O2                                                                       | 2.40723      |
| Y1-O2                         | 2.39051      | Y1-O2                                                                       | 2.40753      |

**Table S2** CIE color coordinates (x, y) for the  $\text{YBO}_3:0.04\text{Bi}^{3+}, x\text{Eu}^{3+}, y\text{Tb}^{3+}$  phosphor under excitations.

| Numbe<br>r (no.) | $\text{Bi}^{3+}$<br>concentration | $\text{Eu}^{3+}$<br>concentration | $\text{Tb}^{3+}$<br>concentration | CIE (x,y)<br>values |
|------------------|-----------------------------------|-----------------------------------|-----------------------------------|---------------------|
| 1                | 0.005                             | 0                                 | 0                                 | (0.148, 0.093)      |
| 2                | 0.01                              | 0                                 | 0                                 | (0.147, 0.095)      |
| 3                | 0.02                              | 0                                 | 0                                 | (0.147, 0.100)      |
| 4                | 0.04                              | 0                                 | 0                                 | (0.145, 0.109)      |
| 5                | 0.06                              | 0                                 | 0                                 | (0.145, 0.113)      |
| 6                | 0.07                              | 0                                 | 0                                 | (0.145, 0.112)      |
| 7                | 0.04                              | 0.004                             | 0                                 | (0.293, 0.190)      |
| 8                | 0.04                              | 0.007                             | 0                                 | (0.357, 0.224)      |
| 9                | 0.04                              | 0.01                              | 0                                 | (0.393, 0.243)      |
| 10               | 0.04                              | 0.02                              | 0                                 | (0.503, 0.300)      |
| 11               | 0.04                              | 0.03                              | 0                                 | (0.550, 0.321)      |
| 12               | 0.04                              | 0.04                              | 0                                 | (0.589, 0.340)      |
| 13               | 0.04                              | 0                                 | 0.004                             | (0.211, 0.214)      |
| 14               | 0.04                              | 0                                 | 0.007                             | (0.223, 0.274)      |
| 15               | 0.04                              | 0                                 | 0.01                              | (0.236, 0.332)      |
| 16               | 0.04                              | 0                                 | 0.02                              | (0.261, 0.455)      |
| 17               | 0.04                              | 0                                 | 0.03                              | (0.276, 0.540)      |
| 18               | 0.04                              | 0                                 | 0.04                              | (0.282, 0.566)      |
| 19               | 0.04                              | 0.003                             | 0.002                             | (0.348, 0.265)      |
| 20               | 0.04                              | 0.003                             | 0.004                             | (0.350, 0.278)      |
| 21               | 0.04                              | 0.003                             | 0.006                             | (0.356, 0.322)      |
| 22               | 0.04                              | 0.003                             | 0.008                             | (0.356, 0.346)      |
| 23               | 0.04                              | 0.004                             | 0.002                             | (0.374, 0.271)      |
| 24               | 0.04                              | 0.004                             | 0.004                             | (0.378, 0.286)      |
| 25               | 0.04                              | 0.004                             | 0.006                             | (0.376, 0.327)      |
| 26               | 0.04                              | 0.004                             | 0.008                             | (0.386, 0.361)      |

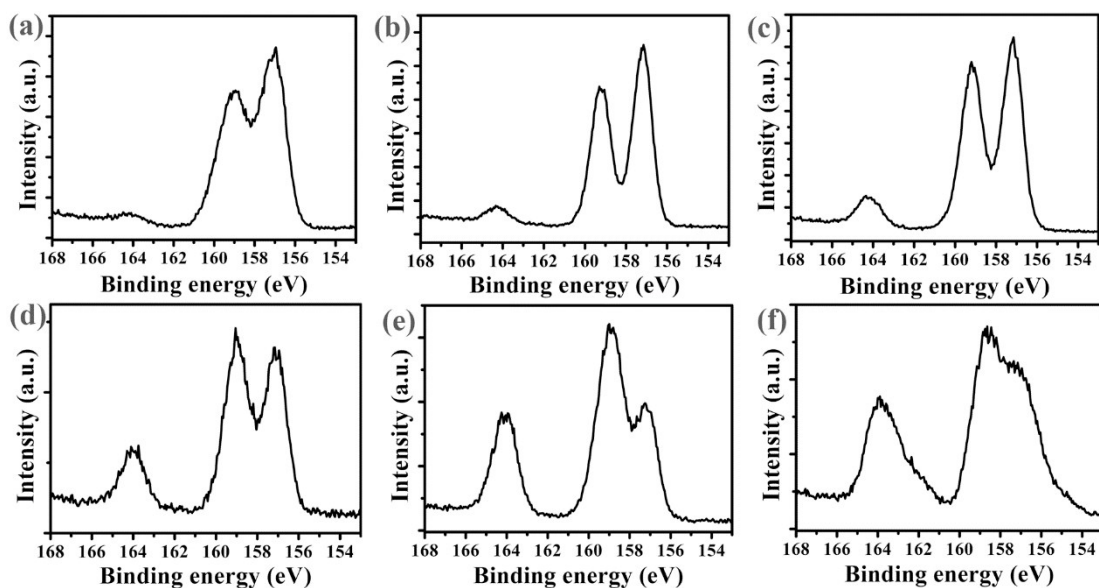

**Fig. S1** XPS spectra of  $\text{YBO}_3:\text{xBi}^{3+}$  samples; (a)  $x=0.005$ , (b)  $x=0.01$ , (c)  $x=0.02$ , (d)  $x=0.04$ , (e)  $x=0.06$ , (f)  $x=0.07$ .

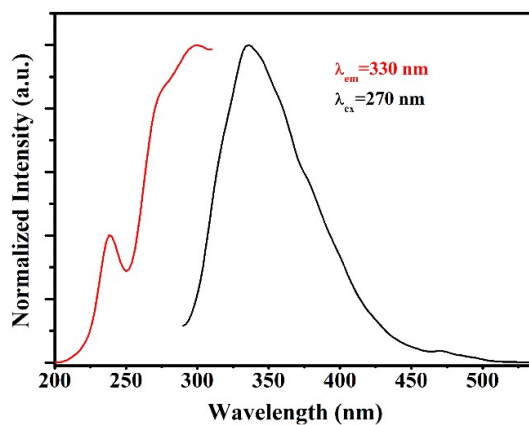

**Fig. S2** Emission and excitation spectra of  $\text{YBO}_3$  host,  $\lambda_{\text{ex}} = 270 \text{ nm}$ ,  $\lambda_{\text{em}} = 330 \text{ nm}$ .

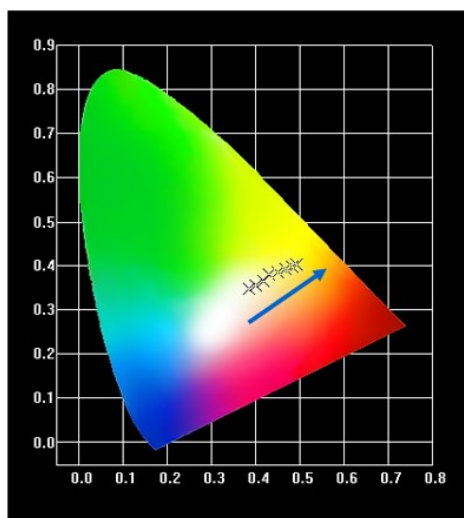

**Fig. S3** The corresponding CIE chromaticity coordinates diagram of high-temperature-dependent emission spectra of  $\text{YBO}_3:0.04\text{Bi}^{3+}$ ,  $0.003\text{Eu}^{3+}$ ,  $0.008\text{Tb}^{3+}$  (298 to 473 K).
